# Supplementary material for: Harbor Porpoise Aggregations in the Salish Sea
Source: Preprints.org preprint supplement (doi:10.20944/preprints202306.0586.v1), 2023-06-08
Supplement: Supplementary file 1 [file supplementary]

Archive with 6 entries (6 files):
- Table S1_CRC_survey.pdf
- Table S2_CRC_reports_long-term.pdf
- Table S3_CRC_reports_short-term.pdf
- Table S4_PacMam.pdf
- Table S5_PWWA.pdf
- Table S6_Sea_View.pdf
