# Supplementary material for: Harbor Porpoise Aggregations in the Salish Sea
Source: Preprints.org preprint supplement (doi:10.20944/preprints202306.0586.v1), 2023-06-08
Supplement: Supplementary file 1 [file supplementary › Table S1_CRC_survey.pdf]

Table S1: Sightings of aggregations during CRC South Puget Sound surveys. Long-term group refers to sightings that verify the aggregation in the north end of Dana Passage, around Johnson Point in 2019 (D2019), 2020 (D2020) and 2021 (D2021a) that were reported by community scientists.

| Date       | Time | Long-term group | Latitude DD | Longitude DD | Number Adults | Calves   | Notes                                                                                                                                                                                                                                                                                                                                                                                                                                          |
|------------|------|-----------------|-------------|--------------|---------------|----------|------------------------------------------------------------------------------------------------------------------------------------------------------------------------------------------------------------------------------------------------------------------------------------------------------------------------------------------------------------------------------------------------------------------------------------------------|
| 2017-02-12 | 1515 |                 | 47.2413     | -122.6961    | 70+           |          | Foraging and fast travel.                                                                                                                                                                                                                                                                                                                                                                                                                      |
| 2017-04-15 | 1155 |                 | 47.1876     | -122.5947    | 20+           | 2        | BTW Steilacoom and Chambers Bay. 20 at one count around basin, formed group of 7 at different time. Often in groups of 3 to 4. They were everywhere. Could have been over 30 easily. Feeding all around the boat. We drifted in a big front that slowed as time passed.                                                                                                                                                                        |
| 2017-07-11 | 1235 |                 | 47.1811     | -122.8283    | 20 to 30      | 10 to 15 | Dispersed feeding aggregation in Dana Passage near Henderson Inlet. Several groups of 2 to 5. One group of 4 juveniles that hung together, would surface in a row 1 2 3 4. Were often splashing when surfacing. At end of sighting an adult joined the end of juv group.                                                                                                                                                                       |
| 2017-08-25 | 1540 |                 | 47.2350     | -122.6464    | 20            | 1        | Travel, possibly mating.                                                                                                                                                                                                                                                                                                                                                                                                                       |
| 2017-08-25 | 1632 |                 | 47.2373     | -122.6526    | 20            |          | Foraging                                                                                                                                                                                                                                                                                                                                                                                                                                       |
| 2017-11-10 | 1250 |                 | 47.1864     | -122.5982    | 20            | 1        | Ate lunch offshore Sunnyside Beach. HP all over far from boat in groups of 2 to 5. 8 inch or so fish jumping all over the place. Foraging.                                                                                                                                                                                                                                                                                                     |
| 2018-03-31 | 1407 |                 | 47.3047     | -122.8520    | 20            |          | Lots of jumping and splashing a few whole bodies out of water. 4 separate groups of 4 to 6 animals. Some side feedings *mating attempt on images*                                                                                                                                                                                                                                                                                              |
| 2018-05-13 | 1125 |                 | 47.3023     | -122.8353    | 50+           |          | Huge aggregation spread out all over top of Case Inlet, near the park. Groups all over 3 to 8 per group. They seemed to circle the whole area. Saw some jumping but not as much as last time, porpoise were everywhere! Sometime groups would merge for short times. Foraging and possible mating                                                                                                                                              |
| 2018-05-13 | 1542 |                 | 47.1950     | -122.6146    | 50+           |          | HP were everywhere past the front between Toliva Shoal and McNeil Island. We were surrounded by aggregation of puffing pigs. Most not close to the boat in groups of 2 to 5. A few were clearing the water but obviously vigorously feeding not mating. Seemed like just as many as in Pickering Passage earlier.                                                                                                                              |
| 2018-05-28 | 1640 |                 | 47.2556     | -122.6829    | 30+           |          | Large aggregation. lots of foraging, saw a few splashes and a leap in the distance                                                                                                                                                                                                                                                                                                                                                             |
| 2018-07-07 | 1550 |                 | 47.2454     | -122.6760    | 50+           | 3        | HP galore all over. Lots of splashing and some leaping. Some breaches for feeding, others mating? Definitely saw a small calf and likely 2 more.                                                                                                                                                                                                                                                                                               |
| 2019-01-21 | 1345 | D2019           | 47.1788     | -122.8346    | 100+          |          | Dana Passage, Henderson Inlet, Case Inlet intersection. 7 to 8 large groups and several small groups distributed across large area. Foraging. Large splashes and aerial behavior. Pam has been seeing this almost daily for about 2 weeks. There were porpoise all over! One group of 6 came close to the boat for a swim by to check us out. We headed up into Case Inlet next but porpoise were only present up to the sand spit to the west |
| 2019-01-26 | 1340 | D2019           | 47.1773     | -122.8429    | 50 to 70      |          | Foraging, surface feeding, deep diving, socializing, and a bit of chasing. Not as many animals as last week and only occasional splashes. No leaping. 2 groups of 8 to 10 animals. Several groups of 3 to 5.                                                                                                                                                                                                                                   |
| 2019-01-26 | 1555 | D2019           | 47.1798     | -122.8203    | 40            |          | A lot of HP still in area. Foraging. Getting dark and heading in                                                                                                                                                                                                                                                                                                                                                                               |
| 2019-03-10 | 1429 | D2019           | 47.1792     | -122.8311    | 75            |          | Lots of HP still at Dana and Henderson Inlets. Surrounded by HP in all directions. A few singles, a few pairs. More groups of 4 to 10 animals. Several groups followed in our wake. Leaps we saw did not appear to be mating. Foraging.                                                                                                                                                                                                        |
| 2019-03-23 | 1705 |                 | 47.1528     | -122.8927    | 15 to 20      |          | HP in small groups from Fishtrap to Squaxin Island to Boston Harbor. 4 near Boston Harbor making some lunging moves. Foraging                                                                                                                                                                                                                                                                                                                  |

| Date       | Time | Long-term group | Latitude DD | Longitude DD | Number Adults | Calves | Notes                                                                                                                                                                                                                                                                                                                                                                                                             |
|------------|------|-----------------|-------------|--------------|---------------|--------|-------------------------------------------------------------------------------------------------------------------------------------------------------------------------------------------------------------------------------------------------------------------------------------------------------------------------------------------------------------------------------------------------------------------|
| 2019-05-05 | 1431 |                 | 47.3035     | -122.8443    | 40 to 60      |        | Many porpoise over large area north of Harstine Island. Saw several examples of logging especially toward Allen Island. One feeding group had at least 4 animals surface simultaneously in a line next to each other, probably in a feeding maneuver. Dave said OrcaNet had comment about lots of HP here earlier this week.                                                                                      |
| 2019-05-26 | 1322 |                 | 47.1495     | -122.8930    | 20 to 30      |        | Foraging in wide area between Boston Harbor and Harstine Island and Brisco point. One group had about 8 individuals. Some 4s ,3s pairs. I also saw bait fish. Groups would go down for a long time and surface far away. Saw splashing and some leaps.                                                                                                                                                            |
| 2019-05-26 | 1355 |                 | 47.1701     | -122.8551    | 15 to 20      |        | Foraging in a wide area at mouth of Henderson to Johnson Point. Saw a pair in air simultaneously.                                                                                                                                                                                                                                                                                                                 |
| 2019-07-22 | 1355 |                 | 47.2415     | -122.6839    | 20 to 30      | 1      | Singles, pairs, triples foraging in a wide area near the surface mostly.                                                                                                                                                                                                                                                                                                                                          |
| 2019-08-05 | 1522 |                 | 47.2453     | -122.7017    | 20            |        | Saw 5 about 300 yard ahead at first. 3 swam toward the starboard side of boat, surfaced about 50 yards away, then swam under boat and surfaced at stern toward port about 30 yards away. Followed boat as we turned a bit and 5 animals surfaced simultaneously to stern. May have been sub adults. Many other HP scattered around area toward McNeil Island. Foraging.                                           |
| 2019-08-09 | 1338 |                 | 47.2338     | -122.6762    | 20 to 30      |        | At first animals spread over wide area in 1, 2, and 3s. Then group of 4 formed and group of 8, and another group of about 5. Foraging.                                                                                                                                                                                                                                                                            |
| 2019-09-21 | 1310 |                 | 47.1807     | -122.8329    | 25            | 1      | Animals cover wide area at north end of Dana Passage near Johnson Point. Animals covering wide area sometimes in larger groups of 6 to 10 and sometimes as pairs or triples or 4. Foraging.                                                                                                                                                                                                                       |
| 2019-11-11 | 1402 |                 | 47.2618     | -122.7166    | 20+           |        | Animals over wide area between Lake Bay and fix island. About 10 off in distance and another 10 in pairs closer to Lake Bay. Foraging                                                                                                                                                                                                                                                                             |
| 2019-11-11 | 1436 |                 | 47.2645     | -122.7443    | 30+           |        | 5 animals foraging near boat for a while. Pair or triple near shore to N side of Mayo Cove. Many into Henderson Bay. We stopped at State Park and HP came closer to cove and increased in numbers in Henderson while we were stopped. Lots of forage fish at surface and jumping.                                                                                                                                 |
| 2020-02-09 | 1410 | D2020           | 47.1781     | -122.8383    | 50 to 75      |        | 3 pairs surfaced near stern at different times during sighting. Lots of animals all over area in groups of 2, 3, 4 and sometimes coming together into groups of 9, 10-ish. Saw one chase close to boat at surface, 1 HP swam next to bow on starboard side and turned on side to look up at boat. HP are back in same area as winter 2019 but not as many. Saw 1 CASL with HP. CASL did a small leap with some HP |
| 2020-02-17 | 1558 |                 | 47.1897     | -122.8304    | 20 to 25      |        | Saw a pair first then animals started to appear all around. Seemed to join together in our wake. Foraging.                                                                                                                                                                                                                                                                                                        |
| 2020-02-20 | 1317 |                 | 47.1765     | -122.8358    | 45            |        | Group of 15 and group of 10 approached the boat from the stern. Foraging                                                                                                                                                                                                                                                                                                                                          |
| 2021-02-08 | 1334 | D2021a          | 47.1766     | -122.8366    | 50 to 70      |        | Pam and Charley have been seeing the aggregation in Dana Passage and the Mouth of Henderson Inlet. We found it today. Many groups of 4 to 10 animals a few pairs. A few chases at surface. Foraging and socializing.                                                                                                                                                                                              |
| 2021-03-27 | 16?  |                 | 47.3033     | -122.8493    | 20+           |        | Aggregation of about 20 would form and split. Foraging in a large circle. Too many to count when they all got calm                                                                                                                                                                                                                                                                                                |
| 2021-07-09 | 1702 |                 | 47.1870     | -122.6031    | 50+           |        | Porpoise everywhere in the current chop and upwelling between Toliva Shoal and Chambers Bay. Leaping seems to be foraging and wave related. Probably not mating attempts. Several chases. Hearing 3 to 5 puffs per second at times. At end of sighting they mostly disappeared and we realized the current chop stopped and it was near slack tide.                                                               |
