# Supplementary material for: Harbor Porpoise Aggregations in the Salish Sea
Source: Preprints.org preprint supplement (doi:10.20944/preprints202306.0586.v1), 2023-06-08
Supplement: Supplementary file 1 [file supplementary › Table S2_CRC_reports_long-term.pdf]

Table S2: Long-term aggregations, those that lasted for over a week, reported by community scientists, grouped together by the long-term ID. Only the first row of each long-term aggregation contains the location and maximum count data for the sighting, unless a second party reported the same aggregation from a different location.

| Datetime         | Latitude DD | Longitude DD | Long-term ID | Reporting Party | Animals | Notes                                                                                                                                                                                                                                                                                                                                                                                                                                                                                                        |
|------------------|-------------|--------------|--------------|-----------------|---------|--------------------------------------------------------------------------------------------------------------------------------------------------------------------------------------------------------------------------------------------------------------------------------------------------------------------------------------------------------------------------------------------------------------------------------------------------------------------------------------------------------------|
| 2019-01-09 13:17 | 47.1748     | -122.8351    | D2019        | Rhubart         | 100+    | We spotted several dorsal fins surfacing at regular intervals about 30 minutes ago and they are still in the area. It looks like there could be a dozen of them hanging around the South Bay Marker. We have some powerful binoculars and they are far enough away that we can't identify if they are dolphins or porpoises. The dorsal fins are rather short, but pointy. At times we can see about six of them at one time. Sorry for the poor description, but it is exciting to see anything these days! |
| 2019-01-09 18:08 |             |              | D2019        | Rhubart         |         | We watched them for a little over an hour after I sent you the message. We believe they are harbor porpoises. They appear to be rather small and the dorsal fins are small pointy triangles. We're quite sure there are over a dozen of them, and it was common to see four to six surfacing at a time. Charlie saw one jump all the way out of the water. They were still around the South Bay marker when we had to leave for town and it was dark when we got home.                                       |
| 2019-01-10 15:28 |             |              | D2019        | Rhubart         |         | We just spotted another group of them along the Harstine Island shoreline, heading north toward the ones we've been watching for a few days. There are at least seven in that group. Since the water is so calm it's easier to spot them. It's amazing how many there are. If I remember correctly the squid are abundant in January, so maybe that is why they're around. People used to jig for squid at night off the docks at Zittel's Marina.                                                           |
| 2019-01-11 12:10 |             |              | D2019        | Rhubart         |         | We are amazed by the number of dorsals again today. They are just all over the place, from the marker to the shore of the peninsula. There are times when you can see six surface at once, then two or three appear in another location. It's impossible to estimate how many there are. It's constant activity.                                                                                                                                                                                             |
| 2019-01-11 17:58 |             |              | D2019        | Rhubart         |         | The porpoise convention was very well attended again today, and some came closer to us, within 400 yards. There have also been several sea lions and lots of birds, so the food supply must be good now. It appears the porpoises work in groups of 4-6, often surfacing at the same time. We didn't see any of them jump out of the water again. It is just amazing how many there are. I hope tomorrow will be a good one for you. We'll be watching for you along with the porpoise!                      |
| 2019-01-13 13:54 |             |              | D2019        | Rhubart         |         | The fog has finally lifted and they're back. I'm certain there are at least ten or twelve in three different groups because I can see them at one time. I'm also sure it is easier to get the "big picture" from our 60' bluff using the 25 power binoculars than it would be to spot them at water level. Glad they're still around.                                                                                                                                                                        |
| 2019-01-15 11:54 |             |              | D2019        | Rhubart         |         | Just lots of dorsal fins, and they're in several different areas. Yesterday the fog was so heavy that we couldn't see anything!                                                                                                                                                                                                                                                                                                                                                                              |
| 2019-01-19 12:01 |             |              | D2019        | Rhubart         |         | It appears the porpoise have moved on! I saw about four total earlier today and now can't find any at all. The water is choppy, which makes it harder to spot them, but I think they've gone away.                                                                                                                                                                                                                                                                                                           |
| 2019-01-20 10:23 |             |              | D2019        | Rhubart         |         | I don't know where they were yesterday but there are dorsals everywhere this morning! There's an impressive number of them.                                                                                                                                                                                                                                                                                                                                                                                  |
| 2019-01-22 16:40 |             |              | D2019        | Rhubart         |         | We just got back from skiing and didn't see any yet today, although they seem to disappear in late afternoon. I would think your estimate of over 100 is accurate. We see them over a very large area from our perspective.                                                                                                                                                                                                                                                                                  |

| Datetime         | Latitude DD | Longitude DD | Long-term ID | Reporting Party | Animals | Notes                                                                                                                                                                                                                                                                                      |
|------------------|-------------|--------------|--------------|-----------------|---------|--------------------------------------------------------------------------------------------------------------------------------------------------------------------------------------------------------------------------------------------------------------------------------------------|
| 2019-01-26 11:13 |             |              | D2019        | Rhubart         |         | Yesterday I even saw one breach! They are most active in the area where you & Laurie were taking pictures and also very near the South Bay marker. There are also two sea lions and many birds.                                                                                            |
| 2019-01-28 14:18 |             |              | D2019        | Rhubart         |         | Yesterday visibility and lighting made it really hard to find any. Today we can see the number hasn't diminished!                                                                                                                                                                          |
| 2019-01-31 17:58 |             |              | D2019        | Rhubart         |         | We're still seeing them consistently. They're sure easier to spot when the water isn't choppy or rippled.                                                                                                                                                                                  |
| 2019-02-02 11:33 |             |              | D2019        | Rhubart         |         | If you weren't busy this would be a good day to see the porpoise. It looks like they invited more of their friends.                                                                                                                                                                        |
| 2019-02-05 14:20 |             |              | D2019        | Rhubart         |         | Yesterday the wind and chop made it impossible to spot them, but today visibility is ideal and there are so many it's not uncommon to see six or eight at one time.                                                                                                                        |
| 2019-02-06 12:06 |             |              | D2019        | Rhubart         |         | I've also noticed that they seem to like to follow the wakes of some boat traffic. (in response to further questions) I wouldn't exactly describe it as wake riding, as it seems more like they're just following prop wash on slower vessels.                                             |
| 2019-02-07 12:08 |             |              | D2019        | Rhubart         |         | Today some of them seem to be even more active. Three times I've seen them come farther out of the water than usual and could even see the tails.                                                                                                                                          |
| 2019-02-07 16:13 |             |              | D2019        | Rhubart         |         | We have seen them come out of the water vertically before. What I noticed today was what appeared to be an enthusiastic roll where the tail was visible as they dove (perhaps for a deep dive?) I wonder if they've been around at other times and we hadn't noticed them until recently.  |
| 2019-02-12 11:18 |             |              | D2019        | Rhubart         |         | Now that visibility has improved we can confirm they are still out there                                                                                                                                                                                                                   |
| 2019-02-16 09:48 |             |              | D2019        | Rhubart         |         | Good visibility, flat water and porpoise everywhere!                                                                                                                                                                                                                                       |
| 2019-02-17 10:51 |             |              | D2019        | Rhubart         |         | The fog has lifted, water is flat and porpoise all around.                                                                                                                                                                                                                                 |
| 2019-02-18 10:50 |             |              | D2019        | Rhubart         |         | Great visibility, sunshine and many porpoise!                                                                                                                                                                                                                                              |
| 2019-02-21 16:23 |             |              | D2019        | Rhubart         |         | We just returned from three days of skiing and as soon as I looked in the "big eyes" I saw them. Just thought I should confirm they're still hanging out!                                                                                                                                  |
| 2019-02-23 09:12 |             |              | D2019        | Rhubart         |         | Today I can see them around the South Bay marker, but it is rather choppy so they are harder to spot.                                                                                                                                                                                      |
| 2019-03-01 18:08 |             |              | D2019        | Rhubart         |         | We just returned from three days of skiing and I looked in the "big eyes" and see there are still porpoise everywhere! Several days before we left the winds were so strong you couldn't tell if anything was out there in the big waves. So, they're still hanging out in the same areas. |

| Datetime         | Latitude DD | Longitude DD | Long-term ID | Reporting Party | Animals | Notes                                                                                                                                                                                                                                                                                                                                                                                                                                                                                                                                                                                                                                                                                                                                                                                                               |
|------------------|-------------|--------------|--------------|-----------------|---------|---------------------------------------------------------------------------------------------------------------------------------------------------------------------------------------------------------------------------------------------------------------------------------------------------------------------------------------------------------------------------------------------------------------------------------------------------------------------------------------------------------------------------------------------------------------------------------------------------------------------------------------------------------------------------------------------------------------------------------------------------------------------------------------------------------------------|
| 2019-03-04 19:25 |             |              | D2019        | Rhubart         |         | The wind died down today and I took a look out over the sound with the big eyes and once again was amazed at the numbers of Harbor Porpoises I saw. I don't remember when they first appeared but it seems to me it has been about two months. I keep wondering what they are eating. I found information on the internet that they need to eat often and consume 6 to 8 lbs. of food per day. Guessing at their numbers being at least 100. Taking the conservative side of how much they eat gave me a figure of 600 lbs. of food a day. If they have been hanging around out there in the same place for 60 days eating every day they have consumed 18 tons of something. That's a lot of something. What are they eating and what is the food they are eating, and why are they all staying in the same place? |
| 2019-03-08 13:22 |             |              | D2019        | Rhubart         |         | We just returned from 3 days away and we looked and the numbers have certainly not diminished!                                                                                                                                                                                                                                                                                                                                                                                                                                                                                                                                                                                                                                                                                                                      |
| 2019-03-13 09:10 | 47.1648     | -122.8561    | D2019        | Sandilands      | 40+     | We had probably 40 + Pp go by my place just now. Direction NE, about 300 yards offshore                                                                                                                                                                                                                                                                                                                                                                                                                                                                                                                                                                                                                                                                                                                             |
| 2019-03-13 10:58 |             |              | D2019        | Sandilands      |         | Group is back same spot, but non directional... likely foraging. As many as 15 at the surface at a time... spread out over about 400 yard x 400 yard area                                                                                                                                                                                                                                                                                                                                                                                                                                                                                                                                                                                                                                                           |
| 2019-03-15 10:08 |             |              | D2019        | Rhubart         |         | We watched the porpoise this morning doing their normal slow rolls as usual, then for the past 30 minutes we noticed large disturbances in the water and looked with binoculars to find that they'd formed into large groups of about 20 and were all aggressively chasing the food. They were moving quite fast with more of their bodies exposed with every roll and they produced a wake with very visible splash. They stayed in their groups and two groups were moving toward the direction of the fishtrap, and the other moved toward the marker. Quite different from anything we've seen before.                                                                                                                                                                                                          |
| 2019-03-16 12:23 |             |              | D2019        | Rhubart         |         | Yesterday was so busy with porpoise activity, and I know we were seeing over 100 and today is really quiet. I've only seen a few small groups so far and no feeding frenzy as we saw yesterday. I wonder where they've gone.                                                                                                                                                                                                                                                                                                                                                                                                                                                                                                                                                                                        |
| 2019-03-17 10:01 |             |              | D2019        | Rhubart         |         | There are quite a few HP visible this morning and we just noticed a runabout that has three people in it actively pursuing them. They just stopped the boat surrounded by the porpoise and two divers went into the water. We're seeing more HP today than we did yesterday.                                                                                                                                                                                                                                                                                                                                                                                                                                                                                                                                        |
| 2019-03-17 02:46 |             |              | D2019        | Rhubart         |         | We were surprised that the porpoise remained quite close to the boat after the divers went into the water. We still see some small groups here, but many fewer than yesterday.                                                                                                                                                                                                                                                                                                                                                                                                                                                                                                                                                                                                                                      |
| 2019-03-20 12:28 |             |              | D2019        | Rhubart         |         | We've only seen a few both yesterday and today. Are they still at Boston Harbor?                                                                                                                                                                                                                                                                                                                                                                                                                                                                                                                                                                                                                                                                                                                                    |
| 2019-03-20 15:13 |             |              | D2019        | Rhubart         |         | In the last hour I've seen quite a few more (maybe 40?) and they appear to be headed from my left to right toward Johnson Point.                                                                                                                                                                                                                                                                                                                                                                                                                                                                                                                                                                                                                                                                                    |
| 2019-03-23 12:58 |             |              | D2019        | Rhubart         |         | There are some groups of HP still visible, The numbers have certainly declined though.                                                                                                                                                                                                                                                                                                                                                                                                                                                                                                                                                                                                                                                                                                                              |
| 2019-03-29 09:40 |             |              | D2019        | Rhubart         |         | We are seeing just a few in the past few days. Three groups of about six seem to be heading east. We miss seeing the abundance that we had for a while.                                                                                                                                                                                                                                                                                                                                                                                                                                                                                                                                                                                                                                                             |
| 2020-02-08 14:05 | 47.1915     | -122.8094    | D2020        | Rhubart         | 70-100  | We're seeing a lot of Harbor Porpoise today! Many more than in recent weeks.                                                                                                                                                                                                                                                                                                                                                                                                                                                                                                                                                                                                                                                                                                                                        |

| Datetime         | Latitude DD | Longitude DD | Long-term ID | Reporting Party | Animals | Notes                                                                                                                                                                                                                                                                                                                                                                                                               |
|------------------|-------------|--------------|--------------|-----------------|---------|---------------------------------------------------------------------------------------------------------------------------------------------------------------------------------------------------------------------------------------------------------------------------------------------------------------------------------------------------------------------------------------------------------------------|
| 2020-02-10 11:07 |             |              | D2020        | Rhubart         |         | It looks to me like there are even more today than I saw yesterday!                                                                                                                                                                                                                                                                                                                                                 |
| 2020-02-20 12:00 |             |              | D2020        | Rhubart         |         | There are a lot of HP visible today. The last two days were too choppy for visibility to be optimal, but we're seeing many today!                                                                                                                                                                                                                                                                                   |
| 2020-03-01 11:19 |             |              | D2020        | Rhubart         |         | I think there are more than ever! There are also many "bird happenings", with gulls and ducks feasting on bait fish. It's fun to see all the activity!                                                                                                                                                                                                                                                              |
| 2020-03-20 17:56 |             |              | D2020        | Rhubart         |         | We were out of town for most of the past two weeks, then returned to winds out of the north and very choppy water for several days. When it returned to calm we started trying to spot the many HP we had been seeing a few weeks before. A few days ago I saw a group of six of them but since then we haven't seen any at all.                                                                                    |
| 2020-03-24 13:54 |             |              | D2020        | Rhubart         |         | In the past few days we are seeing quite a few more each day. Interesting that they appeared to be gone and now they are returning.                                                                                                                                                                                                                                                                                 |
| 2020-11-21 11:11 | 47.1818     | -122.8240    | D2021a       | Rhubart         |         | Visibility is excellent this morning and we're seeing a lot of HP. One interesting thing is that in addition to seeing the dorsal fins as they surface some appear to be just laying on the surface, not moving for quite a while.                                                                                                                                                                                  |
| 2020-11-28 11:44 |             |              | D2021a       | Rhubart         |         | We are seeing a lot more harbor porpoise today and they're spread across our field of view. At times I've seen six dorsals visible at one time. One group is staying close to the South Bay marker.                                                                                                                                                                                                                 |
| 2020-12-24 12:40 |             |              | D2021a       | Rhubart         |         | There are many harbor porpoise visible today, in fact the most we have seen in ages.                                                                                                                                                                                                                                                                                                                                |
| 2020-12-29 10:53 |             |              | D2021a       | Rhubart         |         | We are still seeing many harbor porpoise.                                                                                                                                                                                                                                                                                                                                                                           |
| 2020-12-30 08:44 |             |              | D2021a       | Rhubart         |         | So far there aren't as many as last year, but the numbers seem to be increasing.                                                                                                                                                                                                                                                                                                                                    |
| 2021-01-06 09:14 |             |              | D2021a       | Rhubart         |         | The water is calm this morning and I'm seeing a larger number of HP than I've seen in a long time. In addition to the greater number it's interesting that some seem to be "charging" or aggressively pursuing something. They are also nearer to us than usual, and seem to be spread over a large area.                                                                                                           |
| 2021-01-10 09:52 |             |              | D2021a       | Rhubart         |         | Good visibility today, it seems the numbers are increasing.                                                                                                                                                                                                                                                                                                                                                         |
| 2021-01-31 11:48 |             |              | D2021a       | Rhubart         |         | We're seeing many HP out there, but today certainly wouldn't be a pleasant one to be out there with them!                                                                                                                                                                                                                                                                                                           |
| 2021-02-02 13:59 |             |              | D2021a       | Rhubart         |         | I forgot to mention that the other day I saw a 40ft boat traveling about 12 knots producing a 2 1/2ft wake go right over a group of about 6 HP. Soon after the boat (about 50 yards) passed over them they surfaced and did a little wake riding. Not bow riding. That is the first time we have seen that.                                                                                                         |
| 2021-02-08 13:40 |             |              | D2021a       | Rhubart         |         | We can see the HP surfacing all around you. I was planning to send you a message to let you know the numbers are increasing. Have fun today!We're still seeing lots of activity out there. A few times we've seen one come all the way out of the water, and that is an interesting sight. It looks like they are in small groups of 4 to 6 animals. We haven't seen any sea lions at all lately, just a few seals. |
| 2021-03-10 14:46 |             |              | D2021a       | Rhubart         |         | Today the water is perfectly calm and visibility is great. I've looked several times today and haven't spotted even one harbor porpoise! Very strange indeed!                                                                                                                                                                                                                                                       |

| Datetime         | Latitude DD | Longitude DD | Long-term ID | Reporting Party | Animals | Notes                                                                                                                                                                                                                                                                                                                                                                  |
|------------------|-------------|--------------|--------------|-----------------|---------|------------------------------------------------------------------------------------------------------------------------------------------------------------------------------------------------------------------------------------------------------------------------------------------------------------------------------------------------------------------------|
| 2021-03-29 08:48 |             |              | D2021a       | Rhubart         |         | Yesterday visibility was lousy, but this morning we're seeing a large group and they are much closer than we've seen them before. That group is heading toward Boston Harbor and another smaller group is heading toward Johnson Point.                                                                                                                                |
| 2021-03-29 08:58 |             |              | D2021a       | Rhubart         |         | I just took another look and there are a lot of HP in the distance, near where you were on Saturday. There must be an abundance of food available.                                                                                                                                                                                                                     |
| 2021-04-01 11:42 |             |              | D2021a       | Rhubart         |         | We are seeing them every day, and they seem to be mostly around the South Bay marker. We've also been seeing groups of sea lions and when we see them it seems birds are attracted to the areas where the sea lions are. It would be interesting to know what food is available for them.                                                                              |
| 2021-04-02 09:29 |             |              | D2021a       | Rhubart         |         | We're seeing more every day and they're spread over a much larger area.                                                                                                                                                                                                                                                                                                |
| 2021-04-03 08:40 |             |              | D2021a       | Rhubart         |         | I believe there are more than ever before! (Later that day) When I sent the last message I think we were witnessing a feeding frenzy. They were aggressively lunging forward and great number of birds (gulls, cormorants and ducks) were attracted to the activity. Things have calmed down now and we're still seeing them, although there don't seem to be as many. |
| 2021-04-04 15:59 |             |              | D2021a       | Rhubart         |         | The number of HP we've been seeing has declined in the last two days. There has been a lot of "bird happenings", so there must be an abundance of food.                                                                                                                                                                                                                |
| 2021-04-06 13:14 |             |              | D2021a       | Rhubart         |         | We saw another group of a dozen sea lions this morning, and we've seen several "bird happenings" with cormorants and ducks diving and coming up with shiny bait fish in their beaks when they surface. There are also a fair number of harbor porpoise in the area. It appears there's plenty of food for them.                                                        |
| 2021-04-11 11:36 |             |              | D2021a       | Rhubart         |         | I was just about to send you a message to report that we have not been able to see any, and were surprised because the water is so calm today that visibility is great. Then we saw a group of six or so and they were wake riding and putting on a good show! They were a lot closer than usual and it was fun to watch them.                                         |
| 2021-04-29 08:05 |             |              | D2021a       | Rhubart         |         | We're still seeing a fair number of harbor porpoise every day.                                                                                                                                                                                                                                                                                                         |
| 2021-05-02 13:41 |             |              | D2021a       | Rhubart         |         | We're seeing about six groups with 6-12 in each group. From our perspective they are near and beyond the South Bay marker.                                                                                                                                                                                                                                             |
| 2021-10-18 12:34 | 47.1741     | -122.8343    | D2021b       | Rhubart         | 40+     | We've been seeing HP lately and it seems the numbers are increasing. They are in the area around the South Bay marker #7.                                                                                                                                                                                                                                              |
| 2021-11-01 11:51 |             |              | D2021b       | Rhubart         |         | I'm seeing a fair number of harbor porpoise today, and there have also been more sea lions than usual.                                                                                                                                                                                                                                                                 |
| 2021-11-08 08:32 |             |              | D2021b       | Rhubart         |         | The winds have calmed and the water is flat so visibility is good. I'm seeing an increased number of harbor porpoise and they're spread over a wide area.                                                                                                                                                                                                              |
