# Supplementary material for: Harbor Porpoise Aggregations in the Salish Sea
Source: Preprints.org preprint supplement (doi:10.20944/preprints202306.0586.v1), 2023-06-08
Supplement: Supplementary file 1 [file supplementary › Table S3_CRC_reports_short-term.pdf]

Table S3: Short-term aggregations reported by community scientists to CRC.

| Datetime         | Latitude DD | Longitude DD | Reporting Party | Animals | Notes                                                                                                                                                                                                                                                                                                                                                                                                                                                                                                            |
|------------------|-------------|--------------|-----------------|---------|------------------------------------------------------------------------------------------------------------------------------------------------------------------------------------------------------------------------------------------------------------------------------------------------------------------------------------------------------------------------------------------------------------------------------------------------------------------------------------------------------------------|
| 2021-04-07 13:15 | 47.1517     | -122.9122    | Merriman        | 20+     | This was about an hour ago. The only thing I got here is a super pod of harbor porpoises, at least 20 of them, invading a large bait ball teeming with tiny fish that all manner of fowl and fins are interested in. 6-8 sea lions. Approx. 15 seals. Hundreds of cormorants. Mergansers. Gulls. And an eagle or two trying to snag whatever is available.                                                                                                                                                       |
| 2021-06-25 17:46 | 47.1738     | -122.8312    | Rhubart         | 20+     | For the past few weeks we've been seeing harbor porpoise in the usual area (from our perspective just beyond the South Bay marker) in small groups. We've also seen a few "loners" traveling in Dana Passage. A few times they've appeared to be feeding rather aggressively near the surface. Watching the cormorants in our cove has shown there seems to be an abundance of bait fish.                                                                                                                        |
| 2022-02-15 11:46 | 47.1829     | -122.8284    | Rhubart         | 20+     | We're seeing more HP today than any time recently.                                                                                                                                                                                                                                                                                                                                                                                                                                                               |
| 2022-02-23 11:52 | 47.1896     | -122.8120    | Rhubart         | 20+     | We're seeing an increasing number of harbor porpoise within our field of view. The winds calmed today and visibility is very good.                                                                                                                                                                                                                                                                                                                                                                               |
| 2022-03-18 00:00 | 47.1832     | -122.8127    | Rhubart         | 40+     | Today, for the first time in several weeks, we're seeing HP, and there appears to be a fair number of them.                                                                                                                                                                                                                                                                                                                                                                                                      |
| 2022-04-24 09:07 | 47.3354     | -122.4219    | Roy             | 20+     | I am at Redondo. I'm looking SW from Poverty bay and see 20-30 porpoises foraging in the waters between here and Commencement Bay. Probably somewhere off Dash Point. From my vantage they are pretty spread out west to east. --                                                                                                                                                                                                                                                                                |
| 2022-05-02 09:00 | 47.3360     | -122.4119    | Roy             | 20+     | Pretty active today from where we can view at Redondo. I saw a bunch (20+) at noon, between Redondo and Maury. Now at 2pm, a bunch (20+) more south, we can see them as we're looking toward Ruston. I assume foraging (when they are popping up and back down). I still see a few now directly west of Redondo.                                                                                                                                                                                                 |
| 2022-05-15 11:17 | 47.3455     | -122.3549    | Roy             | 50+     | Too many to guess. From Redondo looking west and then all the way south. They are everywhere. There's also orcas on the area, which is what I'm trying to see. I cannot not look and see the porpoises.                                                                                                                                                                                                                                                                                                          |
| 2022-05-26 15:07 | 47.1951     | -122.8136    | Rhubart         | 40+     | After telling you we haven't been seeing them I saw a fairly large group of them today!                                                                                                                                                                                                                                                                                                                                                                                                                          |
| 2022-06-04 10:02 | 47.3552     | -122.3365    | Roy             | 40+     | Seeing tons this am. All around the bay. Many as you look NW from Redondo. But really everywhere.                                                                                                                                                                                                                                                                                                                                                                                                                |
| 2022-06-07 09:22 | 47.1901     | -122.8280    | Rhubart         | 100+    | There seems to be a lot of HP spread over a large area. And the weather is going to be lovely today in case you want to get a look at them!                                                                                                                                                                                                                                                                                                                                                                      |
| 2022-06-27 12:20 | 47.3534     | -122.3331    | Roy             | 20+     | I'm seeing quite a few porpoises this morning. I noted some earlier closer to the Des Moines shore, north of Redondo. Now, many west of Redondo.                                                                                                                                                                                                                                                                                                                                                                 |
| 2023-01-20 13:20 | 47.1870     | -122.8242    | Rhubart         |         | We're seeing considerably more HP today and they're spread over a very large area. Visibility is ideal with very flat calm water. It's been a long time since we have seen so many. (later that day) I don't think we saw as many as a few years ago, but it was encouraging to see the numbers increasing and also how much larger the area was than previously. I hope conditions improve so you can get out there. In this weather I am grateful we can observe from the comfort of home with big binoculars! |
| 2023-04-10 14:54 | 47.3511     | -122.3430    | Roy             | 20+     | I'm in Redondo and seeing tons of porpoises. A group of 15-20 closer to Redondo, another group more mid way between Maury and Redondo, and still some beyond that. I see them come up, the dorsal fin and they go back down.                                                                                                                                                                                                                                                                                     |
| 2023-04-25 11:18 | 47.1473     | -122.9135    | Merriman        | 40+     | So I missed video, but there were at least 10 just now feeding near the surface. Halfway between me and B Harbor. Near where we first saw them this morning. First one fin. Then two. Then three in a shallow surface. Then the entire aggregation close together and at the surface before they dove and moved on. Others in twos and threes heading south (traveling) into Eld closer to the far (eastern) shore at Cooper Point. (lasted through 2023-03026)                                                  |

| Datetime         | Latitude DD | Longitude DD | Reporting Party | Animals | Notes                                                                                                                     |
|------------------|-------------|--------------|-----------------|---------|---------------------------------------------------------------------------------------------------------------------------|
| 2023-05-11 00:00 | 47.3485     | -122.3286    | Roy             | 100+    | We saw quite a sight in Redondo recently. I captured a video. There were hundreds and hundreds of porpoises all day long. |
