# Supplementary material for: Harbor Porpoise Aggregations in the Salish Sea
Source: Preprints.org preprint supplement (doi:10.20944/preprints202306.0586.v1), 2023-06-08
Supplement: Supplementary file 1 [file supplementary › Table S4_PacMam.pdf]

Table S4: Community scientist reports to PacMam via the mobile app developed by Kwiáht (Center for the Historical Ecology of the Salish Sea).

| Datetime         | Latitude DD | Longitude DD | Animals | Calves | Behavior                                                               | Platform  | Name of observer                  | Notes                                                                                                                                                                                                                                          |
|------------------|-------------|--------------|---------|--------|------------------------------------------------------------------------|-----------|-----------------------------------|------------------------------------------------------------------------------------------------------------------------------------------------------------------------------------------------------------------------------------------------|
| 2022-01-09 19:50 | 47.173      | -122.601     | 20      | 2      | "Dives/surface chases, probably feeding"                               | Shore     | Piper Strand                      | A feeding frenzie for several wild life. Large harbor seals. Surprised no Orcas                                                                                                                                                                |
| 2022-02-10 13:35 |             |              | 30      |        | Unknown                                                                | Shore     | Trevor Derie (posting for Cierra) | 30-40 HP, in groups of 8-10. Cierra has the photos.                                                                                                                                                                                            |
| 2022-02-11 14:51 | 48.626      | -122.733     | 50      | 6      | "Dives/surface chases, probably feeding"                               | Powerboat | Trevor Derie                      | All scattered, largest groups were 2-3. Some SC, no mating attempts. Camera T3i frames 573-633, spacer 634 coast/mountains.                                                                                                                    |
| 2022-05-10 07:51 | 48.163      | -122.472     | 30      | 0      | Traveling in one direction                                             | Shore     | Charvet Drucker                   | Spread out groups, about 4 different ones. Traveling south down port Susan.                                                                                                                                                                    |
| 2022-05-11 13:38 | 48.426      | -122.781     | 50      | 0      | Traveling in one direction, "Dives/surface chases, probably feeding"   | Powerboat | Trevor Derie                      | Most were very directional, but a few SC here and there. No obvious calves. All traveling along the tide rip. Humpback within a mile. T3i frames 1739-1773, spacer 1774 humpback                                                               |
| 2022-06-09 14:43 | 48.386      | -122.792     | 25      | 3      | Traveling in one direction                                             | Powerboat | Trevor Derie                      | Scattered, transient orcas T065As went right through them all without any known hunting, and the HP didn't seem agitated. No porpoising away. The transients could've hunted them on their downtime, But we have no idea. T3i frames 1837-1849 |
| 2022-06-10 00:30 | 48.4022     | -122.708     | 30      |        | Unknown                                                                | Powerboat | Island Adventures                 | East side of Lawson Reef, 20-30+, Tyson Reed naturalist with Island Adventures. Popping up all around boat. Not sure what time.                                                                                                                |
| 2022-06-10 11:27 | 48.163      | -122.472     | 30      | 0      | Traveling in one direction, "Dives/surface chases, probably feeding"   | Shore     | Charvet Drucker                   | Porpoises in port Susan. Porpoises closer to shore traveling north and porpoises closer to mid channel traveling south. This seems like a typical pattern for them                                                                             |
| 2022-08-03 17:20 | 48.4122     | -122.697     | 200     |        | "Dives/surface chases, probably feeding", "Play, socializing, leaping" | Shore     | Trevor Derie                      | 40+ mating attempts and SC abound. At Rosario/Lawson Reef                                                                                                                                                                                      |
| 2022-08-09 13:41 | 48.388      | -122.881     | 25      | 2      | "Dives/surface chases, probably feeding"                               | Powerboat | Trevor Derie                      | All spread out, no defined groups, going every direction                                                                                                                                                                                       |

| Datetime            | Latitude DD | Longitude DD | Animals | Calves | Behavior                                                 | Platform  | Name of observer                   | Notes                                                                                                                                                                                                                                                                                                                                          |
|---------------------|-------------|--------------|---------|--------|----------------------------------------------------------|-----------|------------------------------------|------------------------------------------------------------------------------------------------------------------------------------------------------------------------------------------------------------------------------------------------------------------------------------------------------------------------------------------------|
| 2022-08-27<br>11:43 | 47.1807     | -122.596     | 20      |        | "Dives/surface chases, probably feeding"                 | Shore     | Cherie St.Ours                     | Mostly seeing singles or 2 together and 1 pod with 5. No real direction and no mating behavior. All were spread out over the water. I was viewing from Sunny Side Steilacoom WA. Transients Orcas we're also in the near area. Other birds on the water were 4 Cormorants-and 2 I believe Pigeon Guillemots. Also 5 Harbor Seals were present. |
| 2022-08-28<br>00:05 | 48.2852     | -123.490     | 20      |        | Unknown                                                  | Powerboat | Five Star Whale Watching via Cindy | 20 HP near Race Rocks after the 100 at Constance and 100 farther south by five star whale watching. Time unknown so put 12am to show that.                                                                                                                                                                                                     |
| 2022-08-28<br>18:45 | 48.471      | -122.72      | 20      |        | "Dives/surface chases, probably feeding"                 | Powerboat | Monika Wieland Shields             |                                                                                                                                                                                                                                                                                                                                                |
| 2022-08-29<br>12:30 |             |              | 20      |        | "Dives/surface chases, probably feeding"                 | Shore     | Cherie St.Ours                     | They were spread out in groups of 2-4 and witnessed logging behavior a couple of times.<br><br>Birds in the vicinity were surf scoters, I grebes or loons but they were quite far out                                                                                                                                                          |
| 2022-08-29<br>15:40 | 48.4735     | -122.473     | 20      |        | Unknown                                                  | Powerboat | OIX                                | Outside if Burrows and Allen Islands.                                                                                                                                                                                                                                                                                                          |
| 2022-09-18<br>12:52 | 47.1804     | -122.594     | 25      |        | "Dives/surface chases, probably feeding"                 | Shore     | Cherie St.Ours                     | Loons, grebes, surf scoters, buffleheads<br><br>Report from Sunny Side Steilacoom                                                                                                                                                                                                                                                              |
| 2022-09-25<br>15:02 | 48.415      | -122.674     | 30      | 1      | "Dives/surface chases, probably feeding"                 | Powerboat | Trevor Derie                       | T3i frames 1578-1587. No defined groups, all the HP were scattered and very active surface chases everywhere.                                                                                                                                                                                                                                  |
| 2022-10-10<br>10:04 | 48.418      | -122.786     | 40      | 4      | Traveling in one direction, "Play, socializing, leaping" | Powerboat | Trevor Derie                       | HP Everywhere, at least 40. 4 obvious mc pairs, a couple HP riding our wake. Diesperesed in groups of 3-8, no camera                                                                                                                                                                                                                           |

| Datetime            | Latitude DD | Longitude DD | Animals | Calves | Behavior                                                                  | Platform  | Name of observer       | Notes                                                                                                                                                                                                                                                                                                                                                                                                                                                                                                         |
|---------------------|-------------|--------------|---------|--------|---------------------------------------------------------------------------|-----------|------------------------|---------------------------------------------------------------------------------------------------------------------------------------------------------------------------------------------------------------------------------------------------------------------------------------------------------------------------------------------------------------------------------------------------------------------------------------------------------------------------------------------------------------|
| 2022-10-14<br>11:00 | 47.1808     | -122.596     | 40      |        | "Play, socializing, leaping",<br>"Dives/surface chases, probably feeding" | Shore     | Cherie St.Ours         | Sent my photos and videos to Cindy, I Beach comb Sunny Side and Chambers Bay frequent in spring and summer and this was the most I've seen with the most activity. Breaching and jumping into each other (mating attempts). There were other birds floating, surf scoters. The porpoise seemed to be in groups of 2's plus and scattered. Groups of more than 2 seemed to be moving around each other, no direction. This sighting was at Sunny Side Beach Steilacoom WA<br>Low tide 10:29am high tide 2:31pm |
| 2022-11-09<br>12:07 | 48.545      | -122.896     | 25      |        | Traveling in one direction                                                | Ferry     | Monika Wieland Shields | Heading east - calm enough we could see their blows! In two large groups                                                                                                                                                                                                                                                                                                                                                                                                                                      |
| 2022-11-20<br>19:14 | 48.412      | -122.676     | 100     | 5      | "Dives/surface chases, probably feeding", "Play, socializing, leaping"    | Powerboat | Trevor Derie           | Estimated 100 all spread out, largest group seen was 6. Lots of surface chase, 2 confirmed mating attempts, one of which the calf was present. T3i frames 1454-1506                                                                                                                                                                                                                                                                                                                                           |
| 2022-11-21<br>16:02 | 48.366      | -122.723     | 100     | 2      | "Dives/surface chases, probably feeding", "Play, socializing, leaping"    | Powerboat | Trevor Derie           |                                                                                                                                                                                                                                                                                                                                                                                                                                                                                                               |
