# Supplementary material for: Harbor Porpoise Aggregations in the Salish Sea
Source: Preprints.org preprint supplement (doi:10.20944/preprints202306.0586.v1), 2023-06-08
Supplement: Supplementary file 1 [file supplementary › Table S5_PWWA.pdf]

Table S5: Sightings of harbor porpoise aggregation by whale watch members of Pacific Whale Watch Association (PWWA), recorded on the PWWA mobile app.

| Latitude DD | Longitude DD | Datetime            | Company                      | Count | Notes                                                            |
|-------------|--------------|---------------------|------------------------------|-------|------------------------------------------------------------------|
| 48.4037     | -122.7094    | 2021-02-24<br>12:18 | Outer Island<br>Excursions   | 100   | Would estimate 300+ they were everywhere!                        |
| 48.3481     | -123.7379    | 2021-03-12<br>15:45 | Sooke Coastal<br>Exploration | 26    | Every day right here this time of the year...seen while fishing. |
| 48.3549     | -123.3890    | 2021-03-12<br>14:11 | Five Star Whale<br>Watching  | 20    | Porpoise spread out 20-30                                        |
| 48.7031     | -123.0992    | 2021-03-13<br>14:01 | San Juan Safaris             | 100   | Aprox 100 in the area                                            |
| 48.6269     | -123.1893    | 2021-03-13<br>13:52 | Maya's Legacy                | 50    | -                                                                |
| 48.6507     | -123.0467    | 2021-03-13<br>12:48 | Maya's Legacy                | 20    | Numerous groups of 2-3                                           |
| 48.6139     | -123.0642    | 2021-03-16<br>13:35 | San Juan Safaris             | 70    | Milling, feeding                                                 |
| 48.6981     | -123.0974    | 2021-03-23<br>14:23 | San Juan Safaris             | 25    | Milling, feeding. Calves present.                                |
| 48.6248     | -123.0804    | 2021-03-30<br>13:53 | San Juan Safaris             | 25    | Milling                                                          |
| 48.4143     | -123.2420    | 2021-04-14<br>15:44 | Five Star Whale<br>Watching  | 50    | At least 50 in the flats!!!! Porpoise soup out here              |
| 48.6932     | -123.0934    | 2021-04-24<br>12:45 | Maya's Legacy                | 30    | Nice shwack, spread out foraging. Glassy seas, really nice.      |
| 48.5380     | -122.9490    | 2021-04-24<br>14:22 | San Juan Safaris             | 25    | -                                                                |
| 48.7309     | -123.0787    | 2021-05-01<br>15:48 | San Juan Safaris             | 25    | -                                                                |
| 48.7318     | -123.0759    | 2021-05-01<br>15:43 | San Juan Safaris             | 25    | -                                                                |
| 49.1825     | -123.2971    | 2021-05-09<br>15:08 | Prince Of Whales             | 30    | Porp party                                                       |

| Latitude DD | Longitude DD | Datetime         | Company                  | Count | Notes                                                                                                                      |
|-------------|--------------|------------------|--------------------------|-------|----------------------------------------------------------------------------------------------------------------------------|
| 48.3003     | -123.5532    | 2021-06-13 13:12 | Prince Of Whales         | 100   | I don't usually post porps, but WOW..200 or more!!                                                                         |
| 48.6435     | -123.0523    | 2021-06-13 9:14  | Deer Harbor Charters     | 20    | -                                                                                                                          |
| 48.4706     | -122.7218    | 2021-06-26 11:17 | Outer Island Excursions  | 40    | 40-50 harbor porpoise outside Allen pass. Very active.                                                                     |
| 48.7345     | -123.0495    | 2021-07-24 17:35 | Maya's Legacy            | 20    | -                                                                                                                          |
| 48.7226     | -122.9496    | 2021-07-25 17:07 | Western Prince           | 30    | -                                                                                                                          |
| 48.7325     | -122.9575    | 2021-07-29 13:26 | Eagle Wing Tours         | 100   | 100+ in area feeding.                                                                                                      |
| 48.7356     | -122.9678    | 2021-07-29 11:04 | Maya's Legacy            | 30    | Schwack of harbor porpoise                                                                                                 |
| 48.7406     | -123.0486    | 2021-08-03 15:13 | San Juan Safaris         | 20    | Milling/feeding in area, 20-25 individuals spread out                                                                      |
| 48.7899     | -122.9293    | 2021-08-04 12:30 | Maya's Legacy            | 30    | Good schwack. 30+ actively foraging                                                                                        |
| 48.7368     | -122.9361    | 2021-08-21 11:22 | Maya's Legacy            | 30    | Lots of porpoise spread between West Bank and Parker                                                                       |
| 48.3496     | -123.3531    | 2021-08-24 11:42 | Five Star Whale Watching | 30    | Spread out                                                                                                                 |
| 48.4162     | -123.0362    | 2021-08-24 14:50 | San Juan Safaris         | 25    | Lots more spread out around us                                                                                             |
| 47.8043     | -122.3970    | 2021-09-03 14:26 | Spirit of Orca           | 50    | Tons of harbor porpoise feeding. Salmon running. Only posting because I've never seen so many harbor porpoise here before. |
| 48.3962     | -124.0524    | 2021-09-14 13:27 | Eagle Wing Tours         | 20    | Lots of little groups feeding.                                                                                             |
| 48.4266     | -123.1948    | 2021-09-18 17:44 | Maya's Legacy            | 20    | Looked like some Dalls hybrids present as well                                                                             |
| 48.2781     | -123.4784    | 2021-10-07 13:48 | Five Star Whale Watching | 100   | Several hundred                                                                                                            |

| Latitude DD | Longitude DD | Datetime         | Company                  | Count | Notes                                                                                                            |
|-------------|--------------|------------------|--------------------------|-------|------------------------------------------------------------------------------------------------------------------|
| 49.3291     | -123.2648    | 2021-10-13 15:35 | Prince Of Whales         | 20    | -                                                                                                                |
| 48.7340     | -122.9881    | 2021-10-18 14:45 | San Juan Safaris         | 45    | Milling                                                                                                          |
| 48.6877     | -123.0898    | 2021-11-13 13:05 | Maya's Legacy            | 22    | Active                                                                                                           |
| 48.4540     | -123.2227    | 2021-11-16 14:44 | Five Star Whale Watching | 30    | -                                                                                                                |
| 48.6942     | -123.0789    | 2022-02-06 14:04 | Prince Of Whales         | 48    | Spread all around                                                                                                |
| 48.6427     | -123.1711    | 2022-02-20 13:41 | Eagle Wing Tours         | 20    | Couple groups                                                                                                    |
| 48.6214     | -123.2042    | 2022-02-24 14:27 | Eagle Wing Tours         | 66    | All the way to Turn Point.                                                                                       |
| 48.2694     | -123.5575    | 2022-03-05 9:52  | Prince Of Whales         | 30    | Feeding                                                                                                          |
| 48.2431     | -123.3389    | 2022-03-06 2:05  | Five Star Whale Watching | 30    | Another large group spread out. Babies in both groups                                                            |
| 48.3411     | -123.3615    | 2022-03-06 13:25 | Five Star Whale Watching | 25    | Harbor Porpoise spread out but large number                                                                      |
| 48.3929     | -122.7181    | 2022-03-11 15:54 | Island Adventures        | 100   | Delayed posting: well over 100 harbor porpoise at Lawson Reef. The horizon was full of their little dorsal fins. |
| 48.6298     | -123.1854    | 2022-03-17 15:54 | Eagle Wing Tours         | 42    | Battle ship to Spieden                                                                                           |
| 48.4045     | -122.7071    | 2022-03-22 14:42 | Outer Island Excursions  | 30    | 30 +                                                                                                             |
| 48.4722     | -122.7199    | 2022-03-22 18:50 | The Salish Sea School    | 20    | -                                                                                                                |
| 48.3428     | -123.3153    | 2022-03-25 13:32 | Five Star Whale Watching | 25    | -                                                                                                                |
| 48.6842     | -123.0129    | 2022-04-02 12:12 | Maya's Legacy            | 50    | 50+ in President's Channel closer to Waldron                                                                     |

| Latitude DD | Longitude DD | Datetime         | Company                  | Count | Notes                                                                                                |
|-------------|--------------|------------------|--------------------------|-------|------------------------------------------------------------------------------------------------------|
| 49.6527     | -124.6417    | 2022-04-22 11:34 | Ocean Ecoventures        | 50    | -                                                                                                    |
| 48.6577     | -123.0155    | 2022-05-02 13:57 | Maya's Legacy            | 30    | Nice schwack                                                                                         |
| 48.3907     | -123.2334    | 2022-05-04 14:05 | Maya's Legacy            | 40    | 40+. Not stopping but logging big group as requested.                                                |
| 48.5415     | -123.2305    | 2022-05-21 11:34 | Five Star Whale Watching | 50    | Spread out but a schwack of them                                                                     |
| 48.2972     | -123.5545    | 2022-05-21 13:30 | Prince Of Whales         | 50    | -                                                                                                    |
| 48.5465     | -123.2309    | 2022-05-21 10:25 | Eagle Wing Tours         | 30    | -                                                                                                    |
| 48.5379     | -123.2278    | 2022-05-24 15:24 | Five Star Whale Watching | 20    | Spread out                                                                                           |
| 48.7356     | -123.0492    | 2022-05-28 15:34 | Maya's Legacy            | 100   | Couple hundred harbor porpoise spread around the boat. Reporting big group as requested this spring. |
| 48.6216     | -123.0827    | 2022-06-01 16:59 | All Aboard Sailing       | 45    | Large group spread out                                                                               |
| 48.4441     | -123.2130    | 2022-06-02 16:10 | Five Star Whale Watching | 80    | -                                                                                                    |
| 48.4479     | -123.2092    | 2022-06-02 15:28 | Eagle Wing Tours         | 50    | 50+ feeding                                                                                          |
| 48.3884     | -123.2605    | 2022-06-02 10:27 | Prince Of Whales         | 42    | -                                                                                                    |
| 48.8040     | -123.0073    | 2022-06-02 15:41 | Maya's Legacy            | 20    | Good schwack in tide line                                                                            |
| 48.3005     | -123.5548    | 2022-06-03 12:14 | Orca Spirit Adventures   | 40    | -                                                                                                    |
| 48.3007     | -123.5546    | 2022-06-04 10:53 | Orca Spirit Adventures   | 60    | -                                                                                                    |
| 48.2809     | -123.5321    | 2022-06-07 14:47 | Five Star Whale Watching | 40    | Spread out feeding                                                                                   |

| Latitude DD | Longitude DD | Datetime         | Company                  | Count | Notes                                                                            |
|-------------|--------------|------------------|--------------------------|-------|----------------------------------------------------------------------------------|
| 48.3825     | -123.3167    | 2022-06-07 13:40 | Orca Spirit Adventures   | 40    | -                                                                                |
| 48.7656     | -123.0745    | 2022-06-15 16:14 | Vancouver Whale Watch    | 100   | popping up all over the place with no clear direction of travel                  |
| 48.4083     | -123.2123    | 2022-06-15 13:41 | Prince Of Whales         | 75    | -                                                                                |
| 48.2975     | -123.5659    | 2022-06-16 11:11 | Five Star Whale Watching | 100   | Large amount, some feeding some porpoising. Mom and babies as well. Pretty cool! |
| 48.3006     | -123.5548    | 2022-06-16 11:01 | Five Star Whale Watching | 50    | Feeding                                                                          |
| 48.3014     | -123.5576    | 2022-06-16 13:08 | Orca Spirit Adventures   | 30    | -                                                                                |
| 48.3866     | -123.2755    | 2022-06-17 13:15 | Orca Spirit Adventures   | 20    | -                                                                                |
| 48.7195     | -122.9572    | 2022-06-18 16:00 | San Juan Safaris         | 100   | So many! Great looks! Worth the stop!                                            |
| 48.7923     | -123.0230    | 2022-06-18 11:39 | Eagle Wing Tours         | 75    | Over boiling reef                                                                |
| 48.2859     | -123.5349    | 2022-06-23 12:22 | Orca Spirit Adventures   | 20    | -                                                                                |
| 48.3064     | -123.4543    | 2022-06-24 12:04 | Five Star Whale Watching | 50    | Feeding spread out but lots of them                                              |
| 48.2968     | -123.4215    | 2022-06-24 12:22 | Five Star Whale Watching | 50    | Very sleepy. Last boat about to leave                                            |
| 48.3044     | -123.4114    | 2022-06-25 10:37 | Orca Spirit Adventures   | 50    | -                                                                                |
| 48.7354     | -123.0482    | 2022-06-26 15:48 | Maya's Legacy            | 50    | Tightly grouped. Pretty incredible                                               |
| 48.5465     | -123.2281    | 2022-06-26 12:01 | Prince Of Whales         | 30    | -                                                                                |
| 48.3134     | -123.5189    | 2022-06-26 14:53 | Orca Spirit Adventures   | 20    | -                                                                                |

| Latitude DD | Longitude DD | Datetime         | Company                  | Count | Notes                                                     |
|-------------|--------------|------------------|--------------------------|-------|-----------------------------------------------------------|
| 48.3254     | -123.4538    | 2022-06-27 10:34 | Five Star Whale Watching | 30    | Lots spread out                                           |
| 48.7362     | -123.0925    | 2022-06-27 11:49 | Western Prince           | 25    | -                                                         |
| 48.2978     | -123.5390    | 2022-06-28 11:38 | Five Star Whale Watching | 25    | -                                                         |
| 48.5162     | -122.7635    | 2022-06-29 15:47 | Outer Island Excursions  | 40    | Good schwack in tide lines                                |
| 48.2930     | -123.4660    | 2022-07-10 10:40 | Five Star Whale Watching | 40    | Spread out but lots                                       |
| 48.2842     | -123.5353    | 2022-07-11 10:49 | Eagle Wing Tours         | 100   | Large group of over 100.                                  |
| 48.2838     | -123.5341    | 2022-07-11 10:57 | Five Star Whale Watching | 100   | Lots of them and feeding                                  |
| 48.2896     | -123.5170    | 2022-07-11 11:17 | Orca Spirit Adventures   | 50    | -                                                         |
| 48.2829     | -123.5415    | 2022-07-11 9:49  | Orca Spirit Adventures   | 30    | -                                                         |
| 47.8875     | -122.6063    | 2022-07-14 10:12 | Puget Sound Express      | 20    | Many porpoise apparently feeding with diving birds nearby |
| 48.2919     | -123.5548    | 2022-07-15 10:46 | Five Star Whale Watching | 30    | -                                                         |
| 48.5001     | -122.7650    | 2022-07-15 10:41 | Maya's Legacy            | 20    | -                                                         |
| 48.8842     | -122.8056    | 2022-07-19 15:08 | San Juan Cruises         | 100   | -                                                         |
| 48.9550     | -123.3880    | 2022-07-19 9:49  | Vancouver Whale Watch    | 20    | -                                                         |
| 49.3270     | -123.3665    | 2022-07-23 16:21 | Eagle Wing Tours         | 20    | Seen on ferry                                             |
| 49.2548     | -123.3426    | 2022-07-23 12:27 | Wild Whales Vancouver    | 20    | Looked like feeding, porpoises porpoising                 |

| Latitude DD | Longitude DD | Datetime         | Company                  | Count | Notes                                                                  |
|-------------|--------------|------------------|--------------------------|-------|------------------------------------------------------------------------|
| 48.7915     | -122.9740    | 2022-07-24 11:19 | San Juan Safaris         | 20    | -                                                                      |
| 48.3388     | -123.4059    | 2022-07-25 19:02 | Eagle Wing Tours         | 50    | Lots of HPs in the area, flat calm viewing conditions, jumping as well |
| 48.3532     | -123.3953    | 2022-07-26 14:26 | Five Star Whale Watching | 100   | Lots of Porpoise feeding in all directions                             |
| 48.2992     | -123.4296    | 2022-07-26 11:16 | Five Star Whale Watching | 50    | Feeding                                                                |
| 48.3391     | -123.4153    | 2022-07-26 10:27 | Five Star Whale Watching | 30    | -                                                                      |
| 48.9584     | -123.3555    | 2022-07-29 13:41 | Ocean Ecoventures        | 25    | -                                                                      |
| 48.9737     | -123.3918    | 2022-07-29 14:33 | Vancouver Whale Watch    | 20    | Very spread out, milling around, probably more than 20                 |
| 48.3656     | -123.4083    | 2022-07-30 2:20  | Five Star Whale Watching | 30    | -                                                                      |
| 48.3631     | -123.4700    | 2022-07-31 10:23 | Five Star Whale Watching | 40    | Spread out feeding                                                     |
| 48.3318     | -123.4512    | 2022-07-31 9:43  | Orca Spirit Adventures   | 30    | -                                                                      |
| 48.3462     | -123.4733    | 2022-07-31 10:31 | Orca Spirit Adventures   | 30    | -                                                                      |
| 48.2867     | -123.5080    | 2022-08-05 15:26 | Five Star Whale Watching | 40    | Near the Humpback                                                      |
| 48.1829     | -123.5090    | 2022-08-05 12:11 | Eagle Wing Tours         | 30    | -                                                                      |
| 48.6988     | -122.7579    | 2022-08-09 16:34 | Outer Island Excursions  | 30    | Between Clark and sisters tightly grouped together                     |
| 48.3102     | -123.4879    | 2022-08-11 12:54 | Eagle Wing Tours         | 20    | 20+ animals                                                            |
| 48.3431     | -123.4576    | 2022-08-13 12:36 | Five Star Whale Watching | 30    | Lots spread out feeding including Mom & calf                           |

| Latitude DD | Longitude DD | Datetime         | Company                  | Count | Notes                                                   |
|-------------|--------------|------------------|--------------------------|-------|---------------------------------------------------------|
| 48.2797     | -123.4911    | 2022-08-18 18:47 | Five Star Whale Watching | 100   | -                                                       |
| 48.3042     | -123.4581    | 2022-08-18 18:07 | Five Star Whale Watching | 50    | -                                                       |
| 48.3082     | -123.4703    | 2022-08-18 14:33 | Five Star Whale Watching | 40    | -                                                       |
| 48.3529     | -123.3905    | 2022-08-18 9:53  | Eagle Wing Tours         | 30    | -                                                       |
| 48.2978     | -123.4826    | 2022-08-30 10:03 | Eagle Wing Tours         | 50    | As far as the eye can see porpoise. Several babies too. |
| 48.2811     | -123.5458    | 2022-09-08 10:25 | Eagle Wing Tours         | 50    | -                                                       |
| 48.3220     | -123.3863    | 2022-09-23 14:51 | Five Star Whale Watching | 30    | -                                                       |
| 48.2788     | -123.4763    | 2022-09-23 11:46 | Puget Sound Express      | 25    | Large group distributed                                 |
| 48.5031     | -122.9568    | 2022-09-23 10:40 | Maya's Legacy            | 20    | -                                                       |
| 48.2917     | -123.4822    | 2022-09-24 14:42 | Five Star Whale Watching | 100   | -                                                       |
| 48.2883     | -123.5092    | 2022-09-24 14:04 | Five Star Whale Watching | 40    | Feeding not far from the Humpbacks                      |
| 48.6666     | -123.3535    | 2022-09-24 16:52 | Sidney Whale Watching    | 30    | all directions back and forth                           |
| 48.3121     | -123.4941    | 2022-09-25 14:16 | Five Star Whale Watching | 50    | Feeding in the tide lines                               |
| 48.2799     | -123.5194    | 2022-09-25 12:13 | Puget Sound Express      | 50    | Large active group! Easily 50+                          |
| 48.2849     | -123.4783    | 2022-09-26 14:55 | Five Star Whale Watching | 100   | 300 plus west and east of Race. Some rooster tailing ?  |
| 48.2901     | -123.5318    | 2022-09-26 14:21 | Five Star Whale Watching | 50    | Feeding                                                 |

| Latitude DD | Longitude DD | Datetime         | Company                 | Count | Notes                                                              |
|-------------|--------------|------------------|-------------------------|-------|--------------------------------------------------------------------|
| 48.2761     | -123.5122    | 2022-09-26 10:33 | Orca Spirit Adventures  | 40    | -                                                                  |
| 48.2999     | -123.5541    | 2022-09-26 9:17  | Orca Spirit Adventures  | 20    | Many HP                                                            |
| 48.5105     | -122.9704    | 2022-09-26 9:35  | San Juan Excursions     | 20    | Lots spread out                                                    |
| 48.5135     | -122.9598    | 2022-10-02 16:26 | San Juan Safaris        | 20    | 20+ milling                                                        |
| 48.4658     | -123.1645    | 2022-10-05 14:07 | Outer Island Excursions | 100   | Circling the bait ball                                             |
| 48.4618     | -123.1501    | 2022-10-05 14:45 | Outer Island Excursions | 100   | 200-300. Lots of mating everywhere to                              |
| 48.9029     | -122.8271    | 2022-10-06 11:07 | Outer Island Excursions | 50    | Spread out in pairs and trios                                      |
| 48.4538     | -123.1831    | 2022-10-08 14:15 | Eagle Wing Tours        | 100   | Hundreds milling here ... On goldwing                              |
| 48.2818     | -123.5421    | 2022-10-08 11:02 | Orca Spirit Adventures  | 100   | -                                                                  |
| 48.4701     | -123.1666    | 2022-10-08 15:09 | Outer Island Excursions | 100   | Trending SB as a spread out group                                  |
| 48.7972     | -122.9804    | 2022-10-10 15:14 | San Juan Safaris        | 50    | Milling in whirlpools and boils, porpoising in container ship wake |
| 49.3084     | -123.3409    | 2022-10-10 12:24 | Prince Of Whales        | 20    | -                                                                  |
| 48.4865     | -122.9606    | 2022-10-13 12:57 | San Juan Safaris        | 80    | -                                                                  |
| 48.6310     | -123.0971    | 2022-10-19 13:20 | All Aboard Sailing      | 35    | Everywhere in large groups                                         |
| 48.3458     | -123.7489    | 2022-10-22 11:49 | Prince Of Whales        | 25    | -                                                                  |
| 48.3508     | -123.7619    | 2022-10-23 11:35 | Prince Of Whales        | 100   | -                                                                  |

| Latitude DD | Longitude DD | Datetime            | Company                     | Count | Notes                     |
|-------------|--------------|---------------------|-----------------------------|-------|---------------------------|
| 48.6470     | -122.7375    | 2022-10-23<br>13:47 | Outer Island<br>Excursions  | 40    | 30-40 spread out          |
| 48.4934     | -122.7273    | 2022-10-28<br>16:53 | Outer Island<br>Excursions  | 50    | All in a very tight group |
| 48.3737     | -123.3415    | 2022-12-17<br>13:57 | Five Star Whale<br>Watching | 20    | -                         |
