# Supplementary material for: Harbor Porpoise Aggregations in the Salish Sea
Source: Preprints.org preprint supplement (doi:10.20944/preprints202306.0586.v1), 2023-06-08
Supplement: Supplementary file 1 [file supplementary › Table S6_Sea_View.pdf]

Table S6: Sightings of large aggregations by Sea View Marine Sciences.

| Date       | Species Observed | Time(s)   | Latitude DD | Longitude DD | Group Size | Sea State (Beaufort Scale) | Behavior              |
|------------|------------------|-----------|-------------|--------------|------------|----------------------------|-----------------------|
| 2018-08-10 | Harbor Porpoise  | 850       | 48.3034     | -123.5668    | 20+        | 2                          | Milling               |
| 2018-08-10 | Harbor Porpoise  | 859       | 48.3071     | -123.5700    | 50+        | 1                          | Milling               |
| 2019-06-06 | Harbor Porpoise  | 1058-1128 | 48.3036     | -123.5705    | 40+        | 0-1                        | Feeding               |
| 2019-06-06 | Harbor Porpoise  | 1329      | 48.2943     | -123.5776    | 100+       | 0-1                        | Feeding               |
| 2019-07-17 | Harbor Porpoise  | 908       | 48.2991     | -123.5738    | 30+        | 1                          | Milling               |
| 2021-04-28 | Harbor Porpoise  | 925       | 48.2890     | -123.5660    | ~20        | 2                          | Foraging              |
| 2021-05-19 | Harbor Porpoise  | 1135      | 48.3046     | -123.5600    | 20         | 0                          | Milling               |
| 2022-05-17 | Harbor Porpoise  | 1134      | 48.3019     | -123.5548    | 75-100     | 1                          | Milling               |
| 2022-05-31 | Harbor Porpoise  | 852       | 48.3059     | -123.5587    | 100-150    | 0                          | Foraging              |
| 2022-06-01 | Harbor Porpoise  | 847       | 48.3051     | -123.5516    | 150-200    | 0                          | Foraging/Reproduction |
| 2022-06-02 | Harbor Porpoise  | 852       | 48.3048     | -123.5532    | 200        | 1                          | Foraging/Reproduction |
| 2022-06-03 | Harbor Porpoise  | 828       | 48.3056     | -123.5507    | 100-125    | 2                          | Foraging/Reproduction |
| 2022-06-27 | Harbor Porpoise  | 952       | 48.3007     | -123.5344    | 50-60      | 2                          | Swimming              |
| 2022-09-27 | Harbor Porpoise  | 937       | 48.6583     | -123.4551    | 15-25      | 0                          | Swimming/Foraging     |
